# Supplementary material for: Long- and Short-Term Exposures to PM10 Can Shorten Telomere Length in Individuals Affected by Overweight and Obesity
Source: MDPI journal article supplement (doi:10.3390/life11080808), 2021-08-10
Supplement: s1 [file s1]

**Table S1.** Short-term PM<sub>10</sub> exposure and telomere length. Results expressed as regression coefficients ( $\beta$ ) and percentage change (PC) in telomere length, with corresponding 95% confidence intervals (95%CI), per 10  $\mu\text{g}/\text{m}^3$  increase in PM<sub>10</sub> concentration occurring daily from the day of recruitment (lag 0) up to 30 days before (lag 30).

| Daily lags | $\beta$ | 95%CI            | PC    | 95%CI          | <i>p</i> |
|------------|---------|------------------|-------|----------------|----------|
| Lag 0      | -0.006  | (-0.012; -0.001) | -0.51 | (-0.98; -0.05) | 0.030    |
| Lag 1      | -0.002  | (-0.008; 0.004)  | -0.17 | (-0.64; 0.30)  | 0.474    |
| Lag 2      | -0.003  | (-0.009; 0.002)  | -0.28 | (-0.74; 0.18)  | 0.232    |
| Lag 3      | -0.005  | (-0.010; 0.001)  | -0.38 | (-0.84; 0.07)  | 0.100    |
| Lag 4      | -0.009  | (-0.014; -0.003) | -0.68 | (-1.12; -0.24) | 0.002    |
| Lag 5      | -0.008  | (-0.013; -0.002) | -0.62 | (-1.08; -0.17) | 0.007    |
| Lag 6      | -0.010  | (-0.016; -0.004) | -0.79 | (-1.27; -0.32) | 0.001    |
| Lag 7      | -0.008  | (-0.014; -0.003) | -0.67 | (-1.13; -0.20) | 0.005    |
| Lag 8      | -0.008  | (-0.014; -0.002) | -0.63 | (-1.10; -0.16) | 0.009    |
| Lag 9      | -0.004  | (-0.010; 0.002)  | -0.30 | (-0.77; 0.16)  | 0.200    |
| Lag 10     | -0.006  | (-0.012; -0.001) | -0.50 | (-0.96; -0.04) | 0.034    |
| Lag 11     | -0.004  | (-0.010; 0.002)  | -0.33 | (-0.79; 0.13)  | 0.161    |
| Lag 12     | -0.003  | (-0.009; 0.003)  | -0.25 | (-0.71; 0.21)  | 0.295    |
| Lag 13     | 0.003   | (-0.004; 0.009)  | 0.21  | (-0.30; 0.72)  | 0.412    |
| Lag 14     | 0.005   | (-0.002; 0.011)  | 0.39  | (-0.13; 0.90)  | 0.138    |
| Lag 15     | 0.007   | (0.001; 0.014)   | 0.61  | (0.10; 1.12)   | 0.019    |
| Lag 16     | 0.005   | (-0.001; 0.011)  | 0.38  | (-0.11; 0.86)  | 0.128    |
| Lag 17     | 0.004   | (-0.002; 0.010)  | 0.30  | (-0.17; 0.77)  | 0.214    |
| Lag 18     | 0.004   | (-0.002; 0.010)  | 0.31  | (-0.17; 0.79)  | 0.210    |
| Lag 19     | 0.001   | (-0.005; 0.007)  | 0.08  | (-0.39; 0.54)  | 0.747    |
| Lag 20     | 0.005   | (-0.001; 0.011)  | 0.38  | (-0.11; 0.86)  | 0.127    |
| Lag 21     | 0.007   | (0.001; 0.013)   | 0.54  | (0.04; 1.03)   | 0.035    |
| Lag 22     | 0.003   | (-0.003; 0.009)  | 0.25  | (-0.21; 0.72)  | 0.289    |
| Lag 23     | 0.002   | (-0.004; 0.008)  | 0.14  | (-0.33; 0.61)  | 0.552    |
| Lag 24     | -0.002  | (-0.009; 0.004)  | -0.19 | (-0.69; 0.30)  | 0.437    |
| Lag 25     | -0.006  | (-0.011; 0.000)  | -0.43 | (-0.87; 0.01)  | 0.058    |
| Lag 26     | -0.004  | (-0.010; 0.002)  | -0.31 | (-0.75; 0.12)  | 0.160    |
| Lag 27     | 0.003   | (-0.003; 0.009)  | 0.22  | (-0.27; 0.70)  | 0.382    |
| Lag 28     | 0.005   | (-0.001; 0.011)  | 0.37  | (-0.12; 0.86)  | 0.135    |
| Lag 29     | 0.004   | (-0.001; 0.010)  | 0.35  | (-0.12; 0.82)  | 0.142    |
| Lag 30     | 0.005   | (-0.001; 0.011)  | 0.41  | (-0.09; 0.91)  | 0.105    |

**Table S2.** Short-term PM<sub>10</sub> exposure and telomere length. Results expressed as regression coefficients ( $\beta$ ) and percentage change (PC) in telomere length, with corresponding 95% confidence intervals (95%CI), per 10  $\mu\text{g}/\text{m}^3$  increase in PM<sub>10</sub> concentration values obtained by averaging PM<sub>10</sub> levels of the day of recruitment with the levels of the day before (lag 0–1) and of each preceding day up to 30 days before (lag 0–30).

| Cumulative daily lags | $\beta$ | 95%CI            | PC    | 95%CI          | <i>p</i> |
|-----------------------|---------|------------------|-------|----------------|----------|
| Lag 0–1               | –0.005  | (–0.011; 0.001)  | –0.41 | (–0.92; 0.11)  | 0.120    |
| Lag 0–2               | –0.005  | (–0.012; 0.002)  | –0.43 | (–0.98; 0.13)  | 0.130    |
| Lag 0–3               | –0.006  | (–0.014; 0.001)  | –0.51 | (–1.09; 0.08)  | 0.089    |
| Lag 0–4               | –0.009  | (–0.016; –0.001) | –0.69 | (–1.30; –0.08) | 0.027    |
| Lag 0–5               | –0.011  | (–0.019; –0.003) | –0.84 | (–1.48; –0.20) | 0.010    |
| Lag 0–6               | –0.013  | (–0.021; –0.004) | –0.99 | (–1.66; –0.32) | 0.004    |
| Lag 0–7               | –0.014  | (–0.023; –0.005) | –1.12 | (–1.81; –0.42) | 0.002    |
| Lag 0–8               | –0.016  | (–0.025; –0.007) | –1.24 | (–1.97; –0.52) | 0.001    |
| Lag 0–9               | –0.017  | (–0.026; –0.007) | –1.29 | (–2.05; –0.54) | 0.001    |
| Lag 0–10              | –0.018  | (–0.028; –0.008) | –1.41 | (–2.19; –0.64) | 0.000    |
| Lag 0–11              | –0.019  | (–0.030; –0.009) | –1.49 | (–2.30; –0.69) | 0.000    |
| Lag 0–12              | –0.020  | (–0.030; –0.009) | –1.53 | (–2.36; –0.70) | 0.000    |
| Lag 0–13              | –0.019  | (–0.030; –0.008) | –1.49 | (–2.36; –0.63) | 0.001    |
| Lag 0–14              | –0.018  | (–0.030; –0.007) | –1.42 | (–2.32; –0.52) | 0.002    |
| Lag 0–15              | –0.013  | (–0.026; –0.001) | –1.04 | (–2.00; –0.07) | 0.036    |
| Lag 0–16              | –0.012  | (–0.025; 0.001)  | –0.90 | (–1.90; 0.10)  | 0.078    |
| Lag 0–17              | –0.011  | (–0.024; 0.003)  | –0.82 | (–1.84; 0.21)  | 0.117    |
| Lag 0–18              | –0.008  | (–0.022; 0.005)  | –0.66 | (–1.73; 0.40)  | 0.223    |
| Lag 0–19              | –0.007  | (–0.021; 0.007)  | –0.58 | (–1.68; 0.52)  | 0.303    |
| Lag 0–20              | –0.005  | (–0.020; 0.009)  | –0.42 | (–1.55; 0.70)  | 0.458    |
| Lag 0–21              | –0.003  | (–0.017; 0.012)  | –0.20 | (–1.34; 0.95)  | 0.733    |
| Lag 0–22              | –0.001  | (–0.016; 0.014)  | –0.10 | (–1.26; 1.06)  | 0.865    |
| Lag 0–23              | 0.001   | (–0.015; 0.016)  | 0.04  | (–1.12; 1.20)  | 0.944    |
| Lag 0–24              | –0.000  | (–0.015; 0.015)  | –0.01 | (–1.18; 1.16)  | 0.991    |
| Lag 0–25              | –0.002  | (–0.017; 0.014)  | –0.14 | (–1.32; 1.03)  | 0.812    |
| Lag 0–26              | –0.002  | (–0.017; 0.014)  | –0.12 | (–1.31; 1.08)  | 0.850    |
| Lag 0–27              | 0.001   | (–0.016; 0.017)  | 0.04  | (–1.18; 1.26)  | 0.950    |
| Lag 0–28              | 0.002   | (–0.014; 0.018)  | 0.15  | (–1.08; 1.38)  | 0.816    |
| Lag 0–29              | 0.003   | (–0.013; 0.020)  | 0.25  | (–0.99; 1.50)  | 0.690    |
| Lag 0–30              | 0.006   | (–0.011; 0.022)  | 0.44  | (–0.84; 1.72)  | 0.498    |

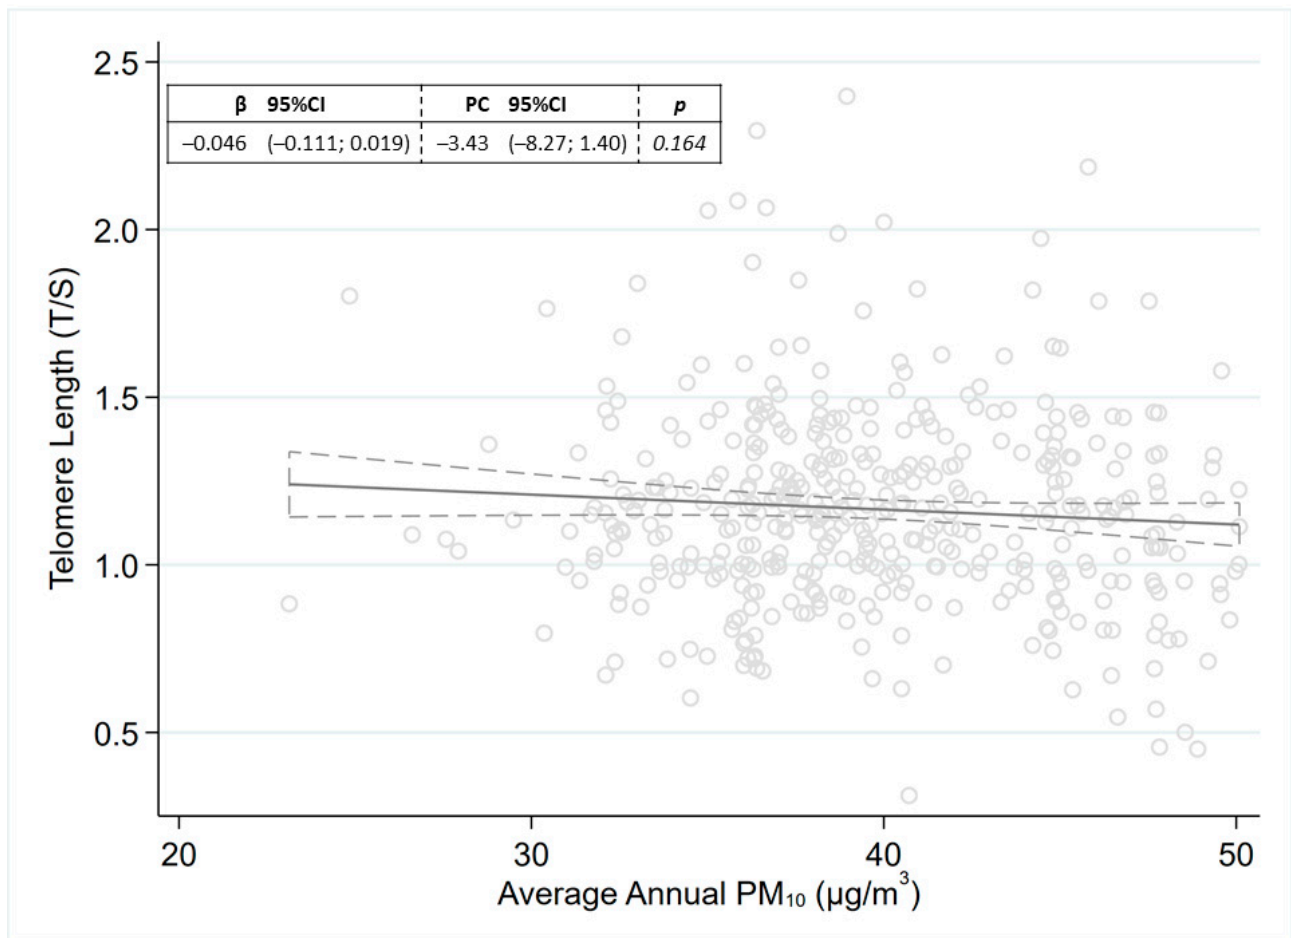

**Figure S1.** Long-term PM<sub>10</sub> exposure and telomere length among subjects with overweight (BMI < 30, number of non-missing observations = 415). Results expressed as regression coefficient ( $\beta$ ) and percentage change (PC) in telomere length, with corresponding 95% confidence intervals (95%CI), per 10  $\mu\text{g}/\text{m}^3$  increase in the average of PM<sub>10</sub> levels of the 365 days preceding recruitment.

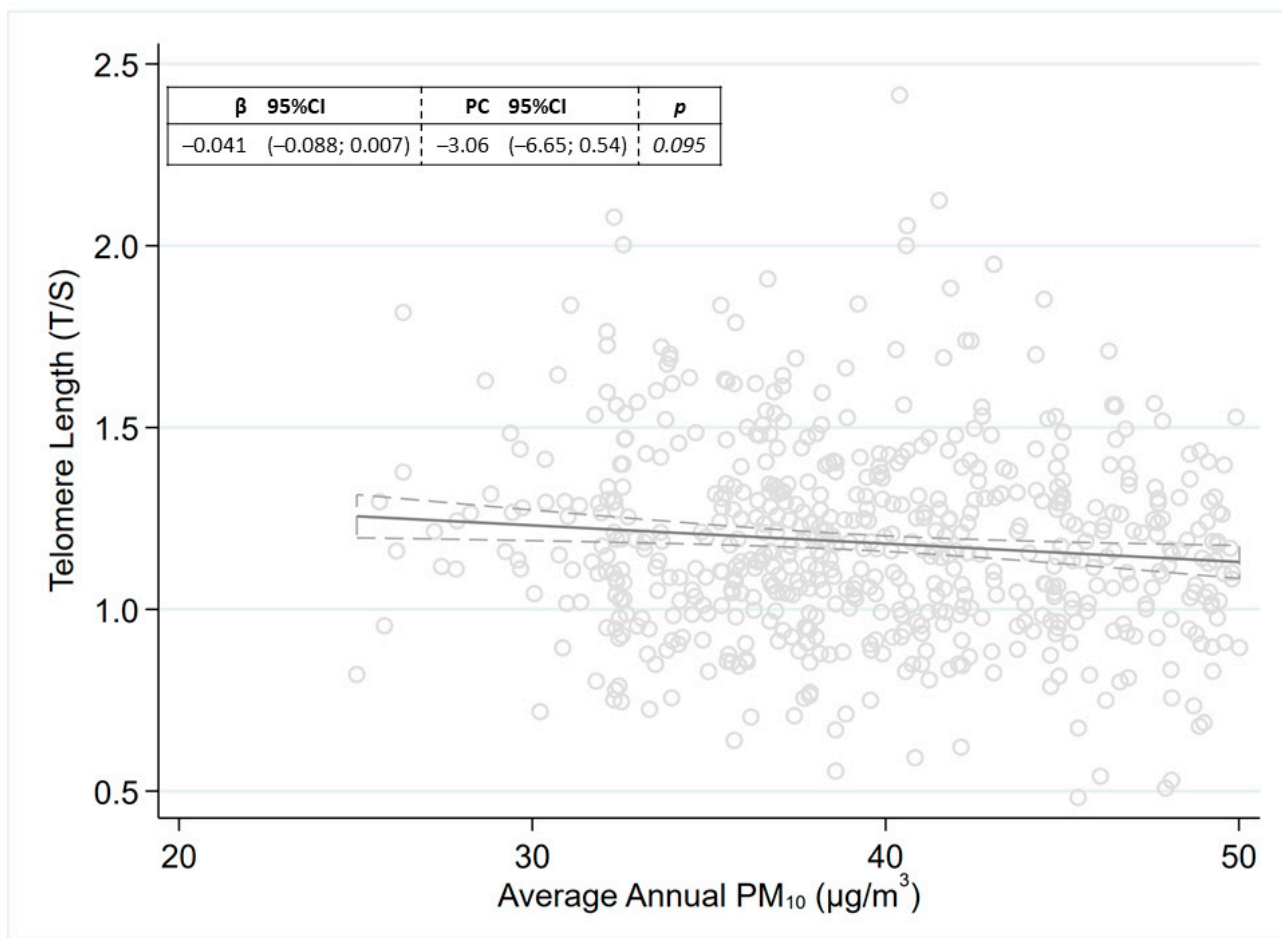

**Figure S2.** Long-term PM<sub>10</sub> exposure and telomere length among subjects with obesity class I (BMI = 30–34.99, number of non-missing observations = 592). Results expressed as regression coefficient ( $\beta$ ) and percentage change (PC) in telomere length, with corresponding 95% confidence intervals (95%CI), per 10  $\mu\text{g}/\text{m}^3$  increase in the average of PM<sub>10</sub> levels of the 365 days preceding recruitment.

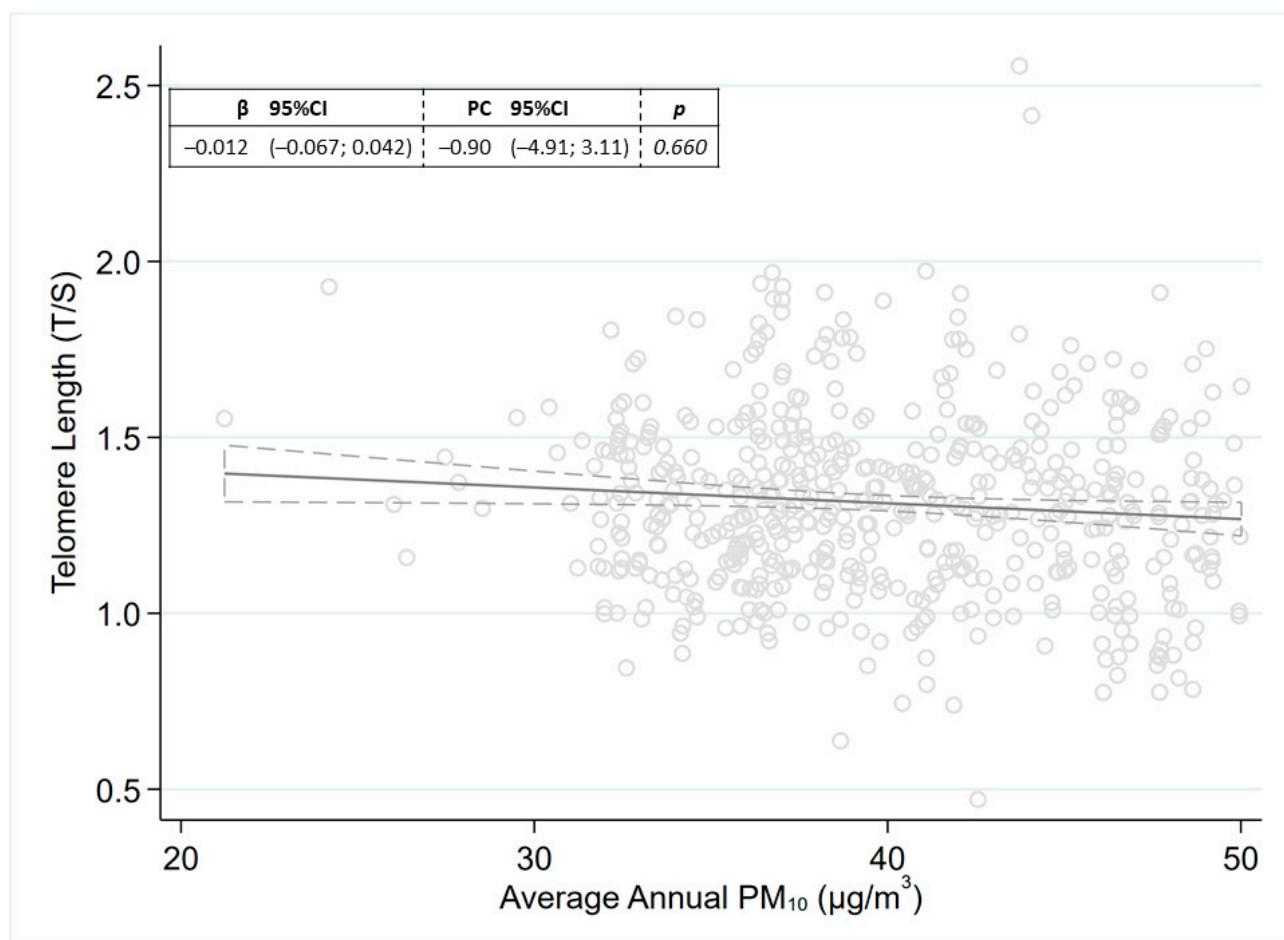

**Figure S3.** Long-term PM<sub>10</sub> exposure and telomere length among subjects with obesity class II and III (BMI  $\geq 35$ , number of non-missing observations = 525). Results expressed as regression coefficient ( $\beta$ ) and percentage change (PC) in telomere length, with corresponding 95% confidence intervals (95%CI), per 10  $\mu\text{g}/\text{m}^3$  increase in the average of PM<sub>10</sub> levels of the 365 days preceding recruitment.
